# Supplementary material for: Association of rs699947 (−2578 C/A) and rs2010963 (−634 G/C) Single Nucleotide Polymorphisms of the VEGF Gene, VEGF-A and Leptin Serum Level, and Cardiovascular Risk in Patients with Excess Body Mass: A Case–Control Study
Source: MDPI journal article supplement (doi:10.3390/jcm9020469), 2020-02-08
Supplement: s1 [file s1]

**Title:** Association of rs699947 (-2578 C/A) and rs2010963 (-634 G/C) single nucleotide polymorphisms of the *VEGF* gene, VEGF-A and leptin serum level, and cardiovascular risk in patients with excess body mass: A case–control study.

**Authors:** Damian Skrypnik, Adrianna Mostowska, Paweł Piotr Jagodziński, Paweł Bogdański

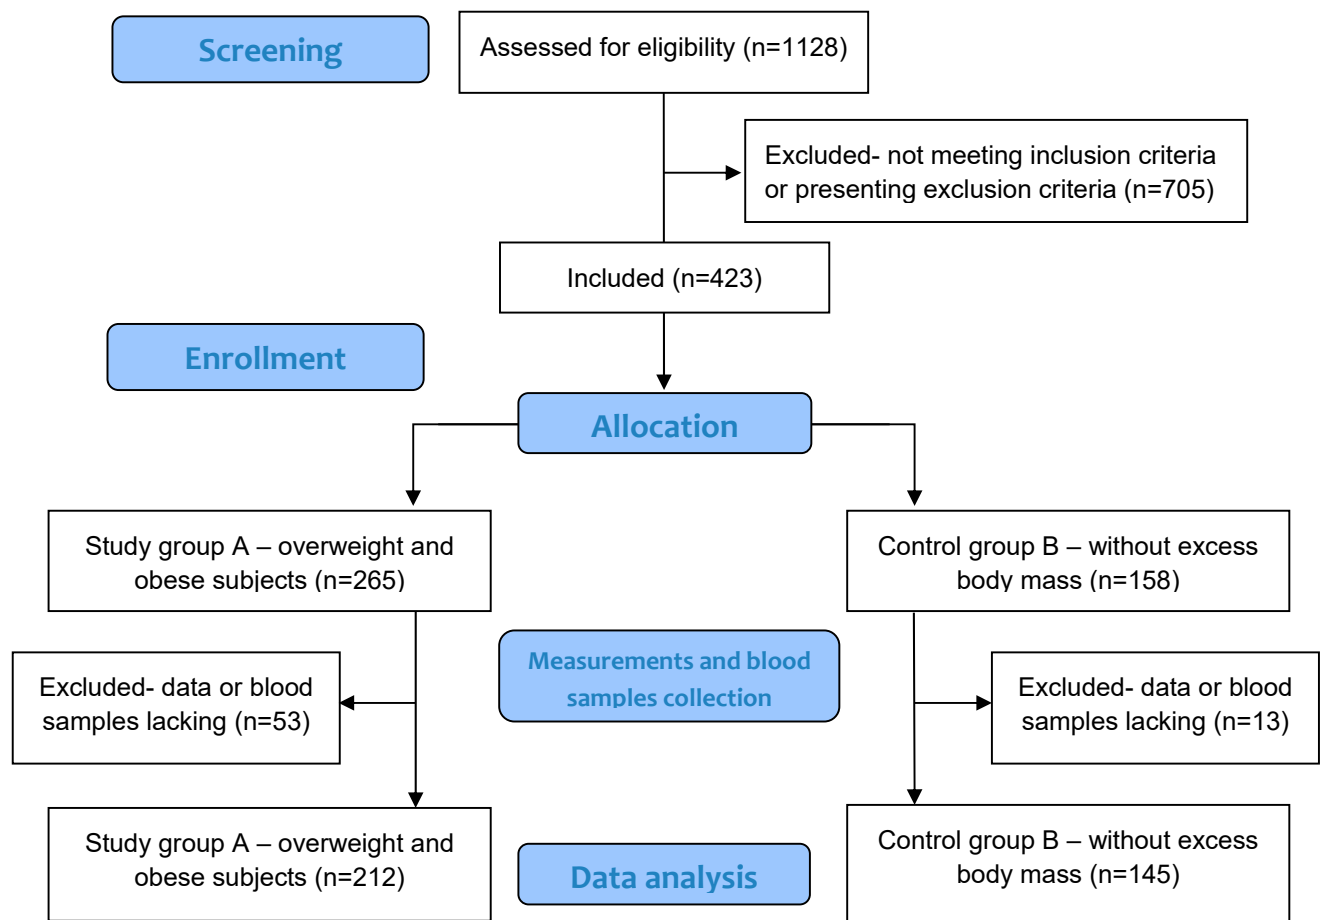

**Figure S1.** Flow diagram of the study
